# Supplementary material
Source: PubMed Central journal article supplement (PMC1230972)
Supplement: iai_73_10_6981__1.pdf [file iai_73_10_6981__1.pdf]

## SUPPLEMENTARY DATA

Consisting of two Tables and one Figure.

**Table S1:**  $^1\text{H}$  chemical shifts,  $^3J_{\text{HNHA}}$  coupling constants and backbone amide temperature coefficients of R1 in 95%  $\text{H}_2\text{O}/5\% \text{ } ^2\text{H}_2\text{O}$  with 10mM acetate at pH 4.5 and 278 K.

| Residue | NH   | $\text{C}^\alpha\text{H}$ | $\text{C}^\beta\text{H}$ | Others                                                                                                                                       | $^3J_{\text{HNHA}}$<br>Hz | $\Delta\delta/\Delta T$<br>(ppb/ $^\circ\text{C}$ ) |
|---------|------|---------------------------|--------------------------|----------------------------------------------------------------------------------------------------------------------------------------------|---------------------------|-----------------------------------------------------|
| Val 1   | ---- | 3.76                      | 2.18                     | $\text{C}^\gamma\text{H}_3$ 1.00,0.86                                                                                                        |                           |                                                     |
| Phe 2   | 8.83 | 4.65                      | 3.08                     | C(2,6)H 7.27 C(3,5)H 7.35                                                                                                                    | 6.7                       | 8.2                                                 |
| Ala 3   | 8.40 | 4.20                      | 1.26                     |                                                                                                                                              | 6.9                       | 6.2                                                 |
| Glu 4   | 8.24 | 4.11                      | 1.85                     | $\text{C}^\gamma\text{H}_2$ 2.21,2.13                                                                                                        | 7.0                       |                                                     |
| Phe 5   | 8.38 | 4.63                      | 3.10,3.00                | C(2,6)H 7.23 C(3,5)H 7.32                                                                                                                    | 7.3                       |                                                     |
| Leu 6   | 8.20 | 4.59                      | 1.55                     | $\text{C}^\gamma\text{H}$ 1.51 $\text{C}^\delta\text{H}_3$ 0.89                                                                              | 7.5                       | 8.3                                                 |
| Pro 7   | ---- | 4.30                      | 2.23,1.77                | $\text{C}^\gamma\text{H}_2$ 1.97 $\text{C}^\delta\text{H}_2$ 3.69,3.58                                                                       |                           |                                                     |
| Leu 8   | 8.35 | 4.20                      | 1.56                     | $\text{C}^\gamma\text{H}$ 1.41 $\text{C}^\delta\text{H}_3$ 0.89,0.83                                                                         | 7.2                       |                                                     |
| Phe 9   | 8.25 | 4.62                      | 3.11,3.04                | C(2,6)H 7.21                                                                                                                                 | 7.9                       |                                                     |
| Ser 10  | 8.24 | 4.38                      | 3.85,3.75                |                                                                                                                                              | 6.6                       |                                                     |
| Lys 11  | 8.43 | 4.16                      | 1.62                     | $\text{C}^\gamma\text{H}_2$ 1.18 $\text{C}^\delta\text{H}_2$ 1.60 $\text{C}^\epsilon\text{H}_2$ 2.90<br>$\text{N}^\epsilon\text{H}_3^+$ 7.61 | 6.8                       |                                                     |
| Phe 12  | 8.29 | 4.62                      | 3.21,2.96                | C(2,6)H 7.25 C(3,5)H 7.36                                                                                                                    | 7.0                       |                                                     |
| Gly 13  | 8.31 | 3.98,3.85                 |                          |                                                                                                                                              |                           |                                                     |
| Ser 14  | 8.30 | 4.43                      | 3.91,3.86                |                                                                                                                                              | 5.9                       |                                                     |
| Arg 15  | 8.51 | 4.31                      | 1.86,1.75                | $\text{C}^\gamma\text{H}_2$ 1.61 $\text{C}^\delta\text{H}_2$ 3.15 NH 7.23                                                                    | 10.3                      |                                                     |
| Met 16  | 8.32 | 4.39                      | 1.94                     | $\text{C}^\gamma\text{H}_2$ 2.51,2.44                                                                                                        | 7.1                       |                                                     |
| His 17  | 8.63 | 4.71                      | 3.21,3.12                | C(2)H 8.59, C(4)H 7.25                                                                                                                       | 7.5                       | 7.2                                                 |
| Ile 18  | 8.34 | 4.11                      | 1.81                     | $\text{C}^\gamma\text{H}_2$ 1.43,1.15 $\text{C}^\gamma\text{H}_3$ 0.87 $\text{C}^\delta\text{H}_3$<br>0.83                                   | 8.4                       |                                                     |
| Leu 19  | 8.53 | 4.38                      | 1.62                     | $\text{C}^\delta\text{H}_3$ 0.85,0.93                                                                                                        |                           | 8.7                                                 |
| Lys 20  | 8.03 | 4.14                      | 1.79,1.71                | $\text{C}^\gamma\text{H}_2$ 1.38 $\text{C}^\delta\text{H}_2$ 1.66 $\text{C}^\epsilon\text{H}_2$ 2.97<br>$\text{N}^\epsilon\text{H}_3^+$ 7.60 | 7.4                       | 8.2                                                 |

**Table S2:** Summary of Experimental Constraints and Structural Statistics for R1

|                                            | R1            |
|--------------------------------------------|---------------|
| No. of distance restraints                 | 204           |
| intraresidue ( $i = j$ )                   | 96            |
| sequential ( $ i-j  = 1$ )                 | 98            |
| medium-range ( $1 <  i-j  < 5$ )           | 10            |
| long-range ( $ i-j  > 4$ )                 | 0             |
| hydrogen bond restraints                   | 0             |
| No. of dihedral restraints                 | 16            |
| Energies <sup>a</sup>                      |               |
| $E_{\text{NOE}}$ (kcal mol <sup>-1</sup> ) | 7.8±1.3       |
| RMS deviations from experimental data      |               |
| NOEs (Å)                                   | 0.028±0.002   |
| Dihedrals (deg)                            | 0.267±0.228   |
| Deviations from ideal <sup>b</sup>         |               |
| angles (deg)                               | 0.63±0.03     |
| bonds (Å)                                  | 0.0044±0.0003 |
| impropers (deg)                            | 0.41±0.02     |
| RMS deviations <sup>c</sup>                |               |
| backbone atoms (global)                    | >2            |
| backbone atoms (residues 5-10, 13-17)      | 1.43, 1.16    |
| Ramachandran plot <sup>d</sup> (%)         |               |
| most favored                               | 45.9          |
| allowed                                    | 52.2          |
| additionally allowed                       | 1.9           |
| disallowed                                 | 0             |

<sup>a</sup> The values for  $E_{\text{NOE}}$  are calculated from a square-well potential with force constants of 50 kcal mol<sup>-1</sup> Å<sup>2</sup>. <sup>b</sup> The values for the bonds, angles, and impropers show the deviations from ideal values based on perfect stereochemistry. <sup>c</sup> The r.m.s.d. (in Å) over the backbone heavy atoms (N, C<sup>α</sup>, C) for the indicated residues. <sup>d</sup> As determined by the program PROCHECK-NMR (Laskowski et al., 1996) except for Pro and Gly.

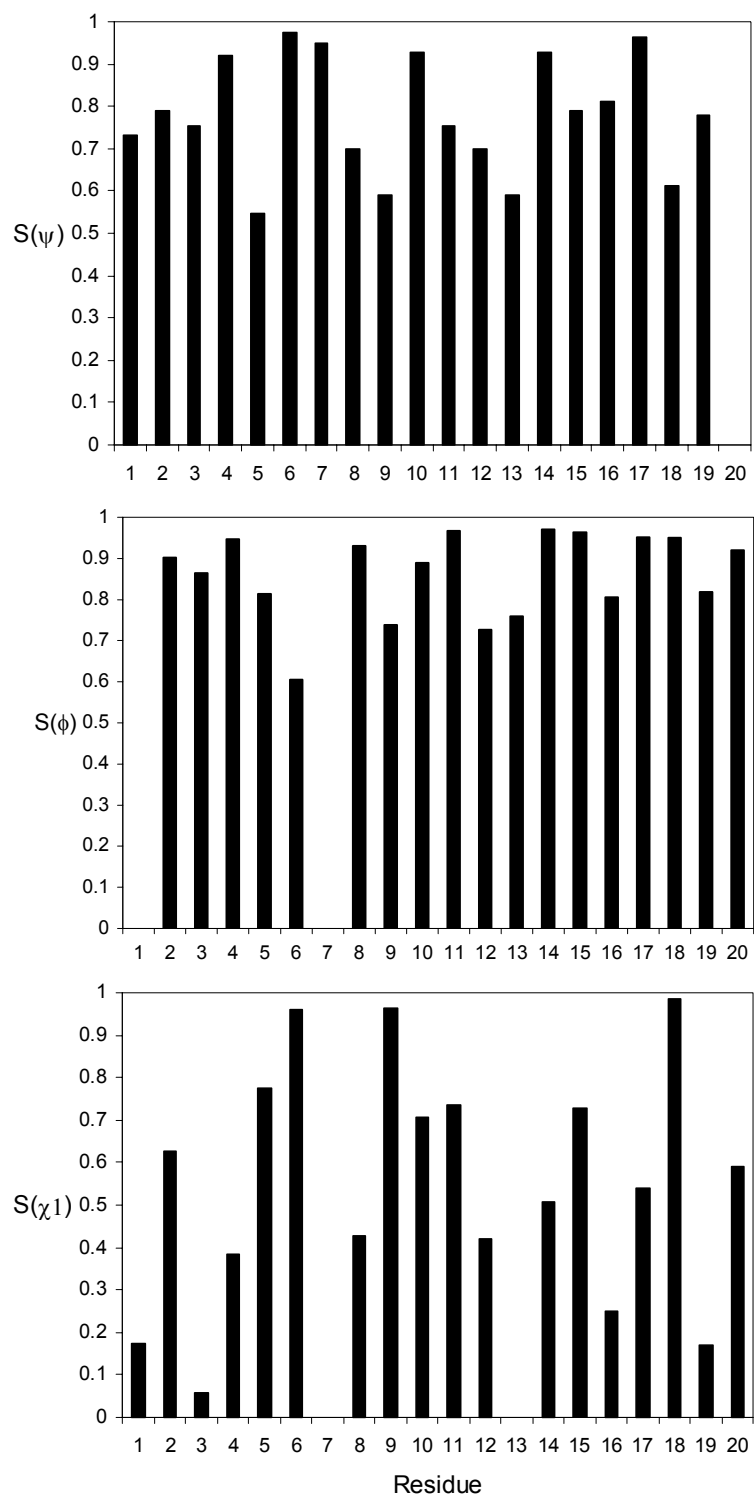

**Figure S1.** Angular order parameters as a function of residue number for R1. Angular parameters were calculated using the program MOLMOL (Koradi et al., 1996).
